# Supplementary material
Source: publisher site journal article supplement (https://www.dovepress.com/article/237558)
Supplement: Supplementary file 1 [file get_supplementary_file.php]

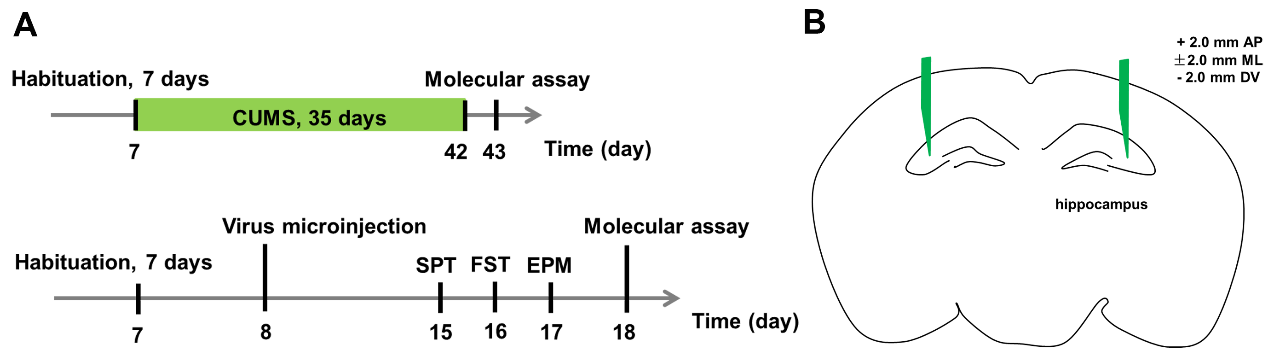


Supplementary Fig.1. (A) Sequence and time interval of each experiment. (B) The position of the needles in hippocampus.


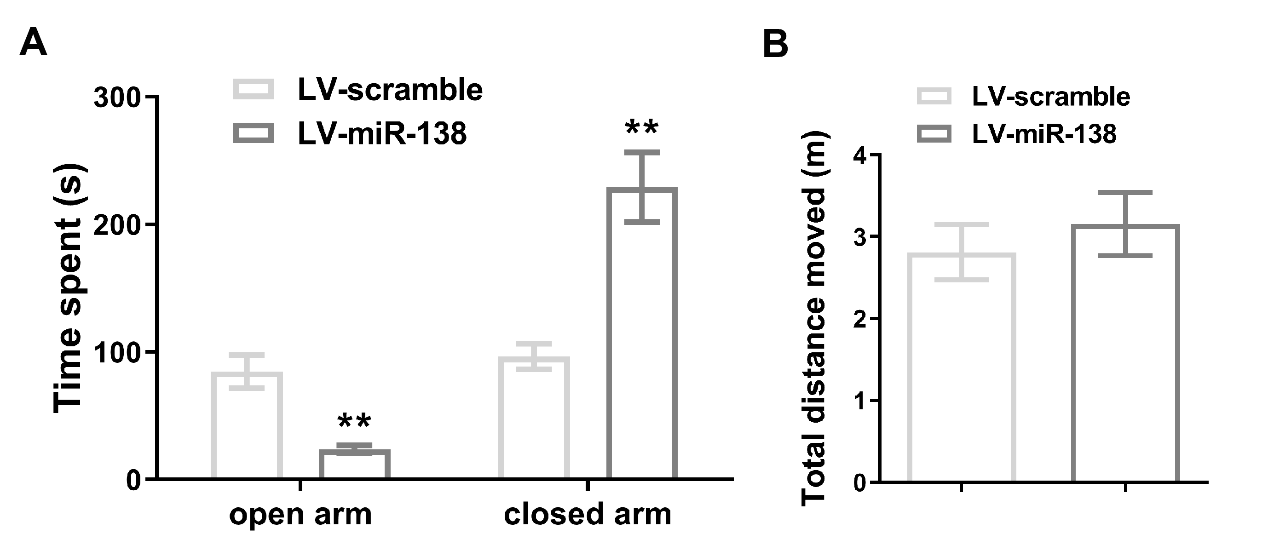


Supplementary Fig.2. miR-138 increased depression-like behavior in CUMS models measured by EPM. (A) Time spent of mice in open arm and closed arm, ** p < 0.01 compared with LV-scramble group. (B) The total distance moved in open arm.
